# Supplementary material for: Leukotriene B4 receptors contribute to house dust mite-induced eosinophilic airway inflammation via TH2 cytokine production
Source: PubMed Central journal article supplement — BMB Rep. 2021 Mar 31;54(3):182–7. doi: 10.5483/BMBRep.2021.54.3.247 (PMC8016659; doi:10.5483/bmbrep.2021.54.3.247), 2021-03-31
Supplement: bmb-54-3-182-supple.pdf [file bmb-54-3-182-supple.pdf]

---

**Leukotriene B<sub>4</sub> receptors contribute to house dust mite-induced eosinophilic airway inflammation via T<sub>H</sub>2 cytokine production**

Donghwan Park, Dong-Wook Kwak and Jae-Hong Kim\*

Department of Biotechnology, College of Life Sciences,  
Korea University, Seoul, 02841, Korea

## Supplementary Figure 1.

A

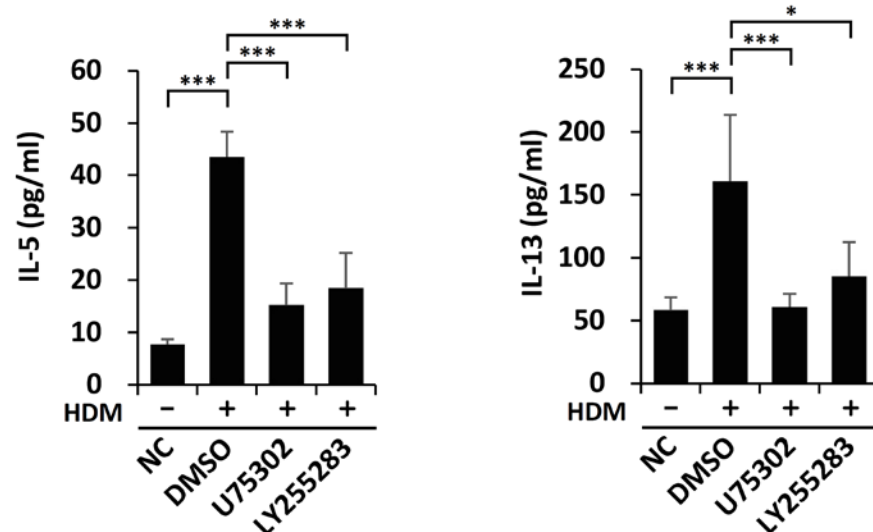

**Supplementary Fig. 1. T<sub>H</sub>2 cytokine synthesis in serum is suppressed by BLT1/2 antagonists in HDM-induced airway inflammation mouse model.**

A. The levels of IL-5 and IL-13 in serum were analyzed using ELISA. Blood was obtained from mice by cardiac puncture, and the collected blood was centrifuged at 2000 × g for 10 min in a refrigerated centrifuge. Then, the serum was collected for ELISA. Data are shown as the mean ± SD (n = 5 per group).

\* $p < 0.05$ , \*\*\* $p < 0.001$  versus the negative (NC) or positive (DMSO) control group.
